# Supplementary material for: Side-chain deuterated cholesterol as a molecular probe to determine membrane order and cholesterol partitioning
Source: Royal Society of Chemistry journal article supplement (doi:10.1039/c9ob01342c), 2019-01-01

## Supporting Information

### **Side-chain deuterated cholesterol probe as a molecular probe to determine membrane order and cholesterol partitioning**

Shinya Hanashima, Yuki Ibata, Hirofumi Watanabe, Tomokazu Yasuda,  
Hiroshi Tsuchikawa, Michio Murata

## Determination of the stereochemistry and optical purity of the intermediate **5** and **24dCho**

(*R*)-MTPA ester **7** was prepared and the stereochemistry at C24 was determined by comparison of the <sup>1</sup>H NMR spectra with the racemic mixture **7'** (Fig.S1). **7'** was prepared from aldehyde **4** via a reduction with NaBH<sub>4</sub> and CeCl<sub>3</sub> to give alcohol **8** in 95% yield. Then, MTPA ester was introduced to give **7'** as a diastereomeric mixture (Scheme S1).

<sup>1</sup>H NMR spectra of **7** and its diastereomeric mixture **7'**, focusing on the H24 signal, are shown in Figure S1. The (*R*)-MTPA group more shields the proton on the *S* isomer than the *R* isomer due to the fixed phenyl group of the MTPA ester. Similar difference of the chemical shifts had been reported in the (*R*)-MTPA ester of (*S*)-1-*d*-1-octanol.<sup>[S1]</sup> Thus, the stereochemistry of C24 was determined in *S* configuration. Furthermore, the other stereoisomer was not observed in the <sup>1</sup>H NMR spectrum of **7**, thus the purity could be more than 95% d.e.

The stereochemistry at C24 of 24dCho was again confirmed by comparison of <sup>1</sup>H-<sup>13</sup>C HSQC spectra between 24dCho and native Cho (Fig.S2). In f2 dimension (<sup>1</sup>H), the signal at pro-chiral C24-H(*proR*) of Cho was 1.09 ppm, while C24-H(*proS*) was 1.11 ppm (Fig.S2A).<sup>[S2]</sup> On the other hand, the signal from the remaining proton at C24 of 24dCho was found at 1.07 ppm with a triplet in f1 dimension because of the geminal <sup>13</sup>C-<sup>2</sup>H coupling (<sup>1</sup>J<sub>C-D</sub> = 17.1 Hz) (Fig.S2B). The disagreement of the chemical shifts can be accounted by deuterium induced isotope (DIS) shifts. DIS of <sup>1</sup>H affected from the geminal <sup>2</sup>H can be estimated within the range between -0.01 and -0.02 ppm.<sup>[S3]</sup> Thus, the stereochemistry at C24 was confirmed as *S* because the C-H correlation corresponding to the C24-H(*proR*) was appeared in the spectrum.

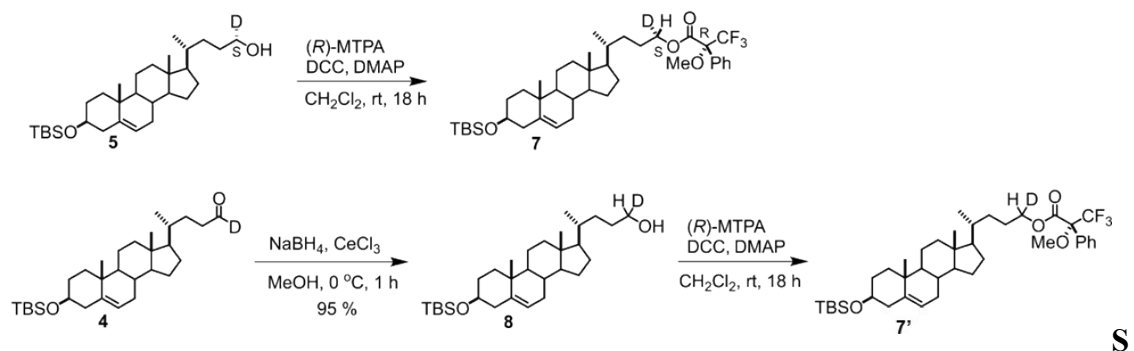

**cheme S1.** Synthesis of the (*R*)-MTPA ester **7** and the diastereomeric mixture **7'** from aldehyde **4**.

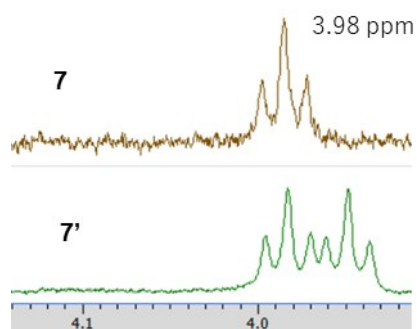

**Figure S1.**  $^1\text{H}$  NMR spectra at C24-H of the synthetic (*R*)-MTPA esters of **7** and its diastereomeric mixture **7'**.

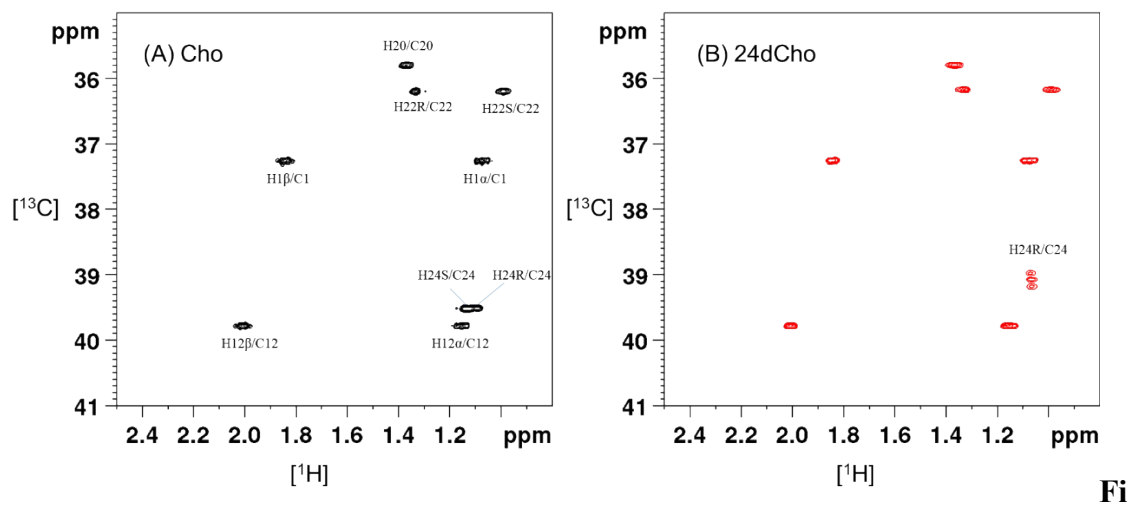

**Figure S2.**  $^1\text{H}$ - $^{13}\text{C}$  HSQC spectra of Cho (A) and 24dCho (B) in  $\text{CDCl}_3$ . Only one HSQC correlation was observed from the C24-H of 24dCho. The spectra were collected with 700 MHz spectrometer (Bruker AVANCE700).

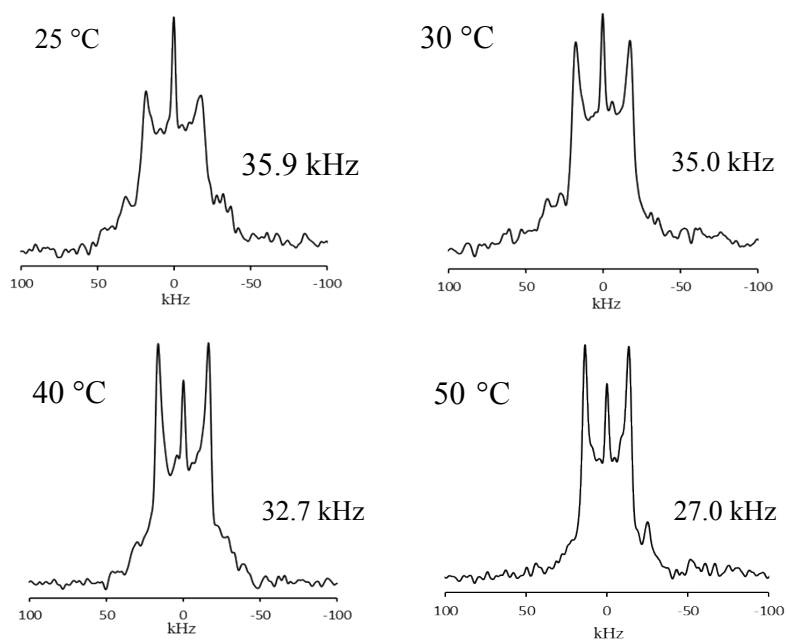

**Figure S3.**  $^2\text{H}$  NMR spectra of 24dCho in PSM/24dCho 8:2 membrane.

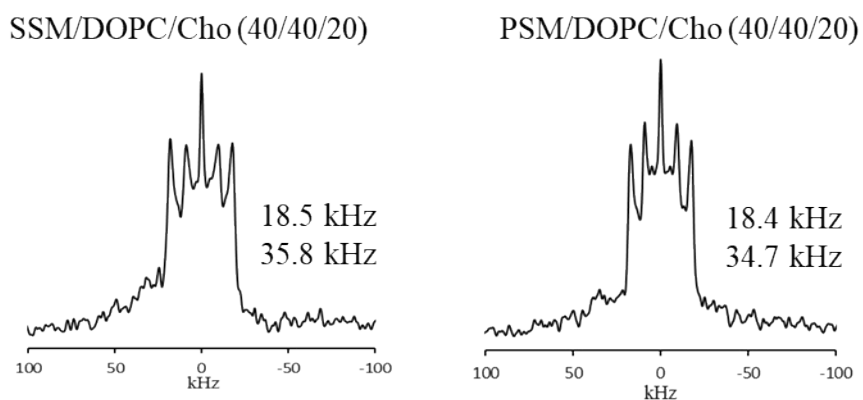

**Figure S4.**  $^2\text{H}$  NMR spectra of 24dCho in SSM/DOPC/Cho 40:40:20 membrane and PSM/DOPC/Cho 40:40:20 membrane at 30 °C.

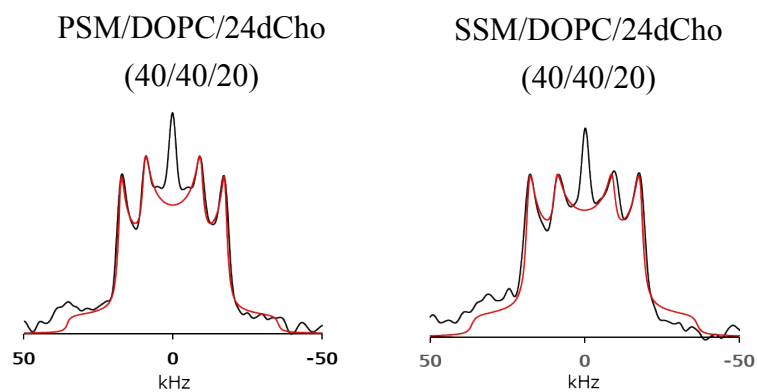

**Figure S5.** The  $^2\text{H}$  NMR spectra and theoretical fitting curves of the SM/DOPC/24dCho 40:40:20 membranes at 30 °C. The experimental spectra were shown with the black traces and the fittings were shown with the red traces.

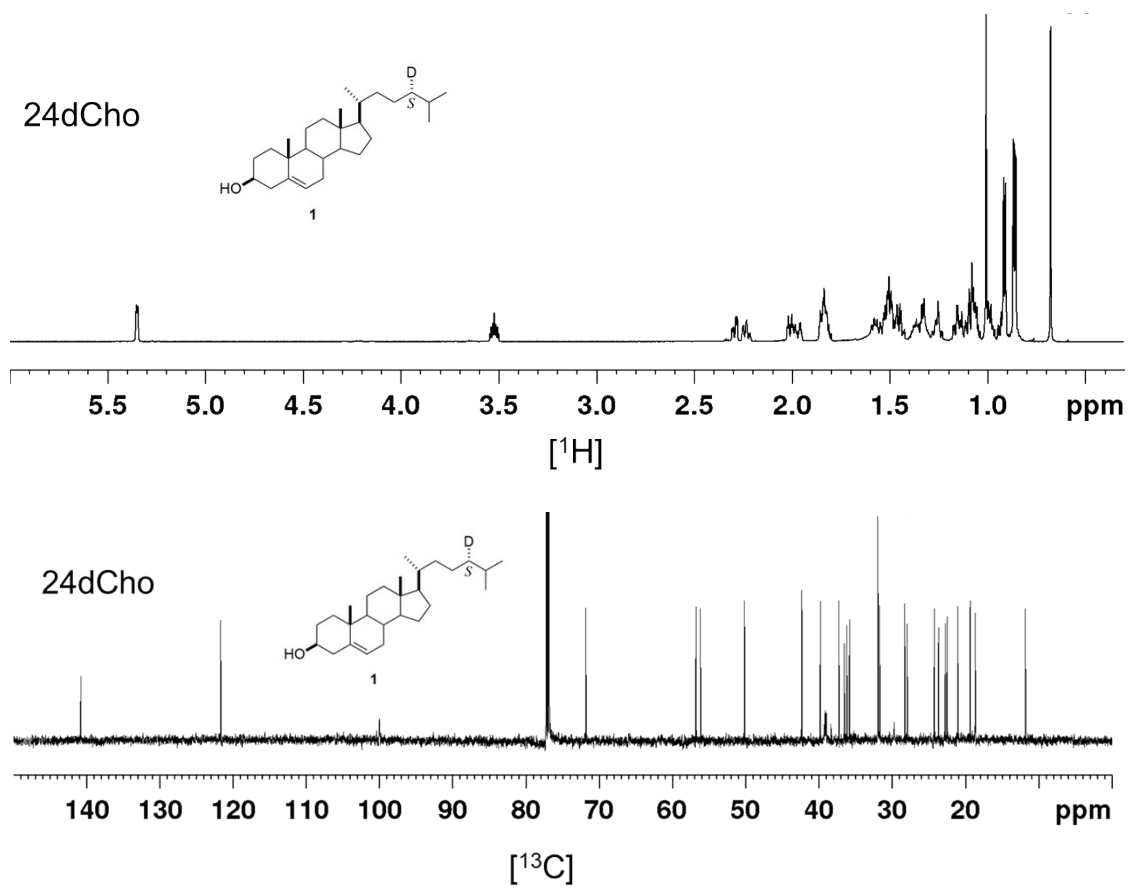

**Figure S6.** <sup>1</sup>H and <sup>13</sup>C NMR spectra of 24dCho in CDCl<sub>3</sub>. The spectra were collected using 700 MHz spectrometer.

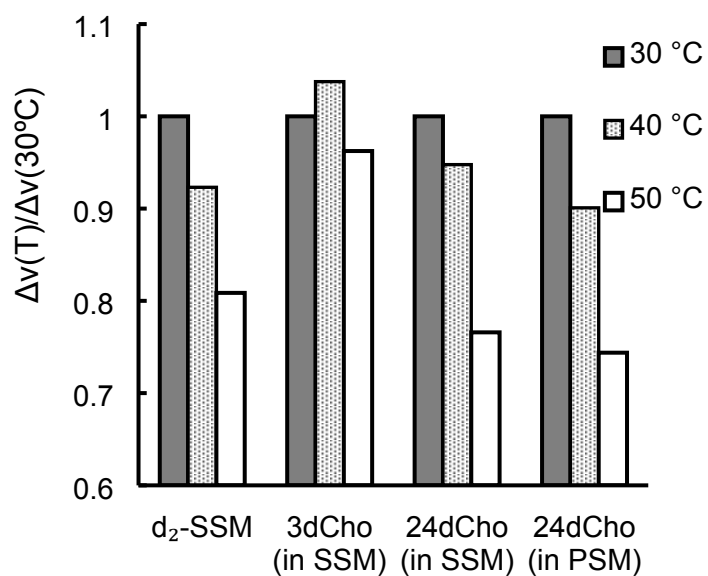

**Figure S7.** The relative  $\Delta\nu$  values of  $d_2$ -SSM, 3dCho, and 24dCho in SSM/Cho (8:2) or PSM/Cho (8:2) membranes by changing temperature ( $T$ ) at 30, 40 and 50 °C. The y-axis values were normalized by that at 30 °C. The  $\Delta\nu$  values are shown in Table 1.



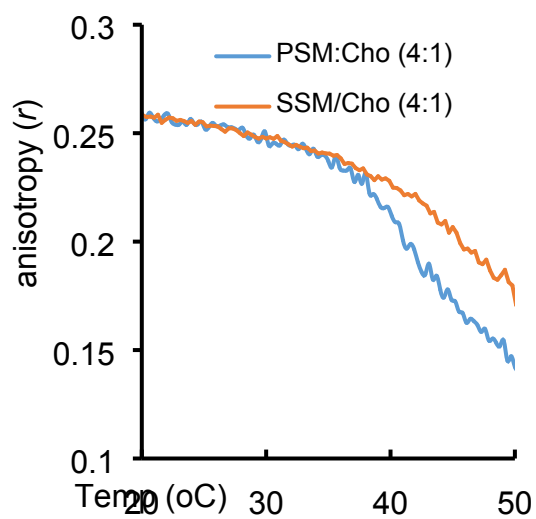

**Figure S8.** DPH anisotropy of the binary and ternary SM membranes whose lipid compositions were used for  $^2\text{H}$  NMR measurements; PSM/Cho (8:2) and SSM/Cho (8:2). MLV was prepared with 200 nmol lipid plus 1 nmol DPH. The data was taken using JASCO FP-6500 spectrometer with 2 mL sample in a quartz cell. DPH; diphenylhexatriene

## Synthetic Procedures

### 24-*d*<sub>2</sub>-(3β)-3-*O*-*tert*-Butyldimethylsilyl-cholest-5-ene-3,24-diol (**3**)<sup>[4]</sup>

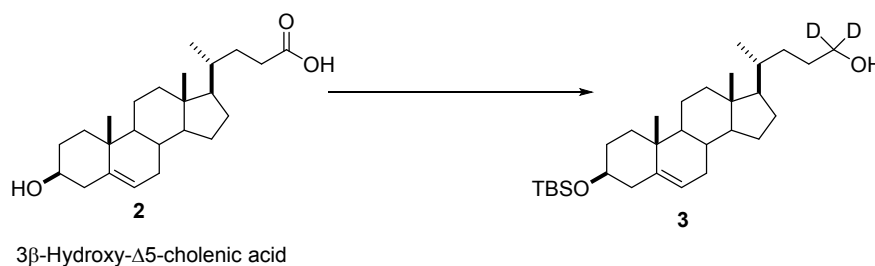

To a solution of the commercial 3-β-hydroxy choleonic acid **2** (244 mg, 0.65 mmol) in DMF (5.5 mL) was added TBSCl (313 mg, 2.08 mmol), imidazole (359 mg, 5.27 mmol), and DMAP (171 mg, 1.40 mmol). The reaction mixture was stirred overnight at room temperature, and then quenched with water. The aqueous phase was extracted with EtOAc (×3), and the combined organic layers were washed with water (×2) and brine (×2), and dried over Na<sub>2</sub>SO<sub>4</sub>. After filtration, the organic layer was concentrated and dried under high vacuum to obtain the crude material (312.5 mg). A part of the crude material (150 mg) was dissolved in dry THF (4 mL) and cooled on ice-water bath for 5 min. LiAlD<sub>4</sub> (63 mg, 1.50 mmol) was added to the solution on ice-water bath. The reaction mixture was stirred overnight at 0 °C to room temperature, and quenched with the sodium potassium tartrate solution. After additional stirring for 5 h, the aqueous layer was extracted with EtOAc (×3). The combined organic phase was washed with water (×2) and brine (×2), and dried over Na<sub>2</sub>SO<sub>4</sub>. After filtration, the organic phase was evaporated and purified with SiO<sub>2</sub> chromatography (Hex/EtOAc = 5:1) to give **3**<sup>[S4]</sup> (96.1 mg, 0.197 mmol, 66%, 2 steps). <sup>1</sup>H NMR (500 MHz, CDCl<sub>3</sub>) δ 5.31 (1H, m, H6), 3.47 (1H, m, H3), 2.25 (2H, m, H4), 0.99 (3H, s, H19), 0.93 (3H, d, *J* = 6.5 Hz, H21), 0.88 (9H, s, TBS-*t*Bu),

0.67 (3H, s, H18), 0.06 (6H, s, TBS-Me).

**24-*d*<sub>1</sub>-(3 $\beta$ )-3-O-*tert*-Butyldimethylsilyl-cholest-5-ene-3-oxy-24-al (4)**

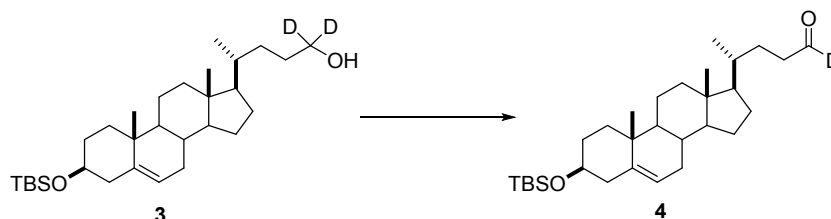

To a solution of the compound **4** (405 mg, 0.85 mmol) in CH<sub>2</sub>Cl<sub>2</sub> (10 mL) was added NaOAc (25 mg, 0.31 mmol) and PCC (239 mg, 1.11 mmol) and stirred overnight at room temperature. Then, the solution was evaporated, and the residue was purified with SiO<sub>2</sub> chromatography (Hex/EtOAc = 2:1) to give **4** (215.6 mg, 0.455 mmol, 54%). The spectral data matches those reported in the literature for the non-deuterated compound.<sup>[S5]</sup> <sup>1</sup>H NMR (500 MHz, CDCl<sub>3</sub>)  $\delta$  5.31 (1H, m, H6), 3.47 (1H, m, H3), 2.39 (2H, m, H23), 2.21 (2H, m, H4), 0.99 (3H, s, H19), 0.92 (3H, d,  $J$  = 6.5 Hz, H21), 0.88 (9H, s, TBS-*t*Bu), 0.67 (3H, s, H18), 0.05 (6H, s, TBS-Me). <sup>13</sup>C NMR (125 MHz, CDCl<sub>3</sub>)  $\delta$  202.9 (C24), 141.5 (C5), 121.1 (C6), 72.6 (C3), 56.8 (C14), 55.8 (C17), 50.2 (C9), 42.8 (C4), 42.3 (C13), 40.8 (C23), 39.8 (C12), 37.3 (C1), 36.6 (C10), 35.3 (C20), 32.1 (C22), 31.9 (C7,C8), 28.1, 27.9 (C16), 25.9 (3C, TBS-*t*Bu), 24.2 (C15), 21.0 (C11), 19.4 (C19), 18.4 (C21), 18.3 (TBS), 11.9 (C18), -4.6 (2C, TBS-Me); HR-ESI-MS C<sub>30</sub>H<sub>52</sub>D<sub>2</sub>O<sub>2</sub>Si [M+H]<sup>+</sup> calcd. 474.3878, found 474.3967.

**24-(*S*)-*d*<sub>1</sub>-(3 $\beta$ )-3-O-*tert*-Butyldimethylsilyl-cholest-5-ene-3,24-diol (5)**

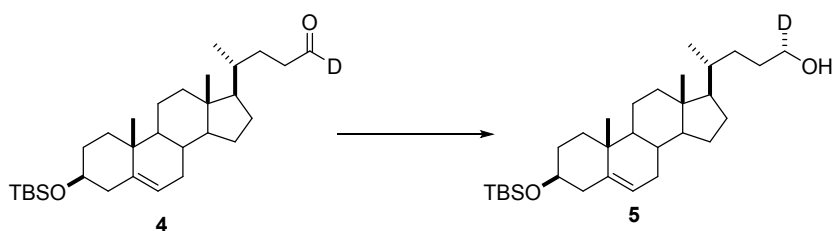

(*R*)-Alpine borane (0.5 M in THF, 1.82 mL, 0.91 mmol) was added to a solution of **4** (216 mg, 0.455 mmol) in dry THF (4 mL) and stirred 1 day at room temperature. Then, the mixture was quenched with acetaldehyde and the solvent was evaporated. The residue was dissolved in Et<sub>2</sub>O (5 mL), cooled on ice-water bath, and then ethanolamine (0.1 mL) was added. After stirring for 1 h at room temperature, the mixture was diluted with water, and extracted with Et<sub>2</sub>O (×3). The combined organic phase was washed with water (×2) and brine (×2), and dried over Na<sub>2</sub>SO<sub>4</sub>. After filtration, the residue was purified with SiO<sub>2</sub> chromatography (Hex/EtOAc = 10:1) to give **5** (207.9 mg, 0.437 mmol, 96%). The spectral data matches those reported for the di-deuterated **3**. <sup>1</sup>H NMR (500 MHz, CDCl<sub>3</sub>) δ 5.31 (1H, m, H6), 3.65 (1H, m, H24), 3.47 (1H, m, H3), 2.21 (2H, m, H4), 0.99 (3H, s, H19), 0.93 (3H, d, *J* = 6.5 Hz, H21), 0.88 (9H, s, TBS-*t*Bu), 0.67 (3H, s, H18), 0.05 (6H, s, TBS-Me); <sup>13</sup>C-NMR (125 MHz, CDCl<sub>3</sub>) δ 141.6 (C5), 121.2 (C6), 72.6 (C3), 70.8 (C24), 56.8 (C14), 56.0 (C17), 50.2 (C9), 42.8 (C4), 42.3 (C13), 39.8 (C12), 37.4 (C1), 36.6 (C10), 35.6 (C20), 32.1 (C22), 31.9 (C2), 31.84 (C7), 31.81 (C8), 29.2 (C23), 28.2 (C16), 25.9 (3C, TBS-*t*Bu), 24.3 (C15), 21.1 (C11), 19.4 (C19), 18.7 (C21), 18.2 (TBS), 11.8 (C18), -4.6 (2C, TBS-Me).; HR-ESI-MS C<sub>30</sub>H<sub>53</sub>DO<sub>2</sub>SiNa [M+Na]<sup>+</sup> calcd. 498.3854, found 498.3882.

**24-(*S*)-*d*<sub>1</sub>-(3β)-3-O-*tert*-Butyldimethylsilyl-cholest-5-ene-3-oxy-24-bromide (**6**)**

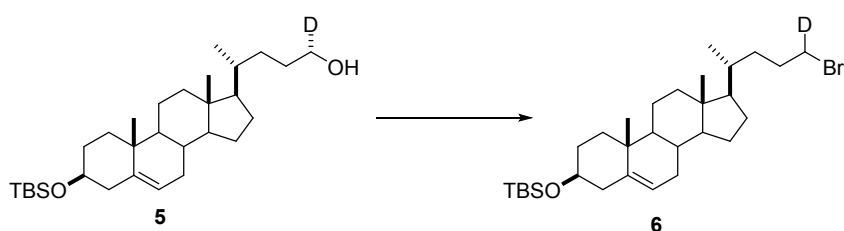

To a solution of **5** (214 mg, 0.45 mmol) in  $\text{CH}_2\text{Cl}_2$  (4.9 mL) was added  $\text{Ph}_3\text{P}$  (205 mg, 0.78 mmol), imidazole (53 mg, 0.78 mmol), and  $\text{CBr}_4$  (226 mg, 0.68 mmol), and stirred for 3 h at room temperature. Upon addition of MeOH for quenching, the mixture was evaporated and purified with  $\text{SiO}_2$  chromatography (Hex/EtOAc = 10:1) to give **6** (170 mg, 0.316 mmol, 70%). The spectral data matches those reported for non-deuterated compound.<sup>[S6]</sup>  $^1\text{H}$  NMR (500 MHz,  $\text{CDCl}_3$ )  $\delta$  5.31 (1H, m, H6), 3.45 (1H, m, H3), 3.38 (1H, t, H24), 2.21 (2H, m, H4), 0.99 (3H, s, H19), 0.93 (3H, d, H21), 0.89 (9H, s, TBS-tBu), 0.68 (3H, s, H18), 0.05 (6H, s, TBS-Me);  $^{13}\text{C}$ -NMR (125 MHz,  $\text{CDCl}_3$ )  $\delta$  141.6 (C5), 121.1 (C6), 72.6 (C3), 56.8 (C14), 55.8 (C17), 50.2 (C9), 42.8 (C4), 42.3 (C13), 39.8 (C12), 37.4 (C1), 36.6 (C10), 35.2 (C20), 34.5 (C24), 32.1 (C22), 31.90 (C7), 31.88 (C8), 29.5 (C23), 28.2 (C16), 25.9 (3C, TBS-tBu), 24.2 (C15), 21.0 (C11), 19.4 (C19), 18.7 (C21), 18.2 (TBS), 11.8 (C18), -4.6 (2C, TBS-Me); HR-ESI-MS  $\text{C}_{30}\text{H}_{53}\text{DOBrSi}$   $[\text{M}+\text{H}]^+$  calcd.538.3190, found 538.3333.

#### 24-(*S*)- $d_1$ -cholesterol (**1**)

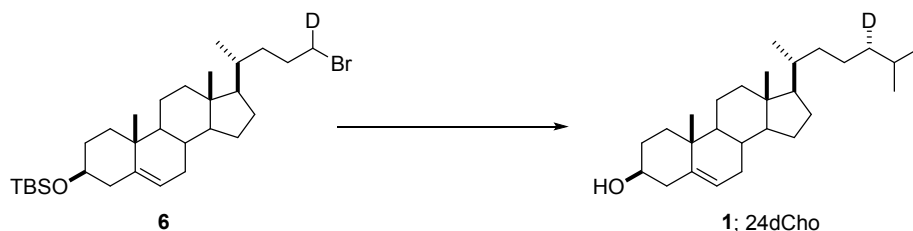

The bromide **6** (170 mg, 0.32 mmol) was dissolved in dry THF (3 mL) and cooled on ice-water bath. Then, the mixed solution of  $\text{Li}_2\text{CuCl}_4$  (0.1 M in THF, 0.47 mL, 0.047 mmol)

and *i*-PrMgBr (1 M in THF, 1.9 mL, 1.9 mmol) was dropwise to the reaction mixture on ice-water bath. After completion of the addition, the mixture was stirred for 3 h at room temperature. Then, the reaction mixture was quenched with NH<sub>4</sub>Cl/Et<sub>2</sub>O=1/1 solution, and the aqueous phase was extracted with Et<sub>2</sub>O (×2). The combined organic phase was washed with brine (×2) and dried over Na<sub>2</sub>SO<sub>4</sub>. After filtration, the solution was evaporated and purified with short SiO<sub>2</sub> column (Hex/EtOAc = 100:1) to give a crude material. The crude was then dissolved in THF (4.5 mL) and the TBAF solution (1 M in THF, 2.87 mL, 2.87 mmol) was added. The mixture was stirred overnight at room temperature and then diluted with EtOAc. The organic phase was washed with 1 M HCl (×2) and brine (×2), and dried over Na<sub>2</sub>SO<sub>4</sub>. After filtration, the mixture was purified with SiO<sub>2</sub> chromatography (Hex:EtOAc = 6:1) to give 24dCho **1** (102 mg, 0.26 mmol, 82%). The spectral data matches those commercial Cho. <sup>1</sup>H NMR (400 MHz, CDCl<sub>3</sub>) δ 5.35 (1H, m, H6), 3.52 (1H, m, H3), 2.25 (2H, m, H4), 1.99 (2H, m, H7, H12), 1.83 (3H, m, H1, H2, H16), 1.61-1.41 (6H), 1.40-1.03 (10H), 1.01 (3H, s, H19), 0.99 (2H), 0.95 (1H), 0.91 (3H, d, H21), 0.86 (6H, dd, H26, H27), 0.68 (3H, s, H18). <sup>13</sup>C NMR (175 MHz, CDCl<sub>3</sub>) δ 140.7, 121.7, 71.8, 56.8, 56.1, 50.1, 42.3, 39.8, 39.1 (dd, <sup>1</sup>J<sub>C-D</sub> = 18.9 Hz), 37.2, 36.5, 36.2, 35.8, 31.9, 31.7, 28.2, 27.9, 24.3, 23.7, 22.8, 22.5, 21.1, 19.4, 18.7, 11.9. HR-ESI-MS C<sub>27</sub>H<sub>47</sub>DO<sub>2</sub> [M+H<sub>2</sub>O]<sup>+</sup> calcd. 405.3712, found 405.3782.

**24-(S)-d<sub>1</sub>-(3β)-3-O-tert-Butyldimethylsilyl-cholest-5-ene-3,24-diol (R)-MTPA ester**  
(7)

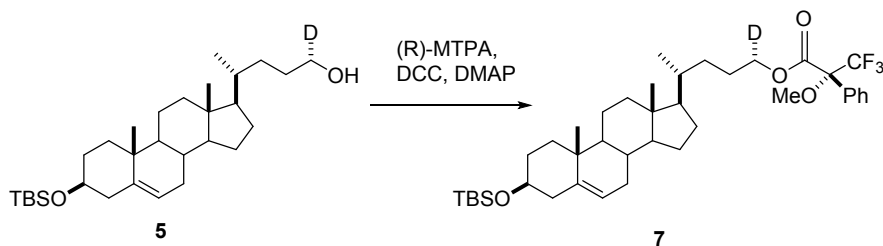

To a solution of **5** (5.5 mg, 0.012 mmol) in CH<sub>2</sub>Cl<sub>2</sub> (0.50 mL) was added DCC (26.4 mg, 0.13 mmol), DMAP (15.6 mg, 0.13 mmol), and (*R*)-MTPA (24.0 mg, 0.10 mmol), and stirred overnight at room temperature. Then, the mixture was diluted with EtOAc, and the organic phase was washed with 1 M HCl and brine, and dried over Na<sub>2</sub>SO<sub>4</sub>. After filtration, the solvent was evaporated and the residue was purified with SiO<sub>2</sub> chromatography (Hex:EtOAc = 20:1) to give ester **7** (6.4 mg, 0.094 mmol, 78%). <sup>1</sup>H NMR (500 MHz, CDCl<sub>3</sub>) δ 7.67-6.94 (5H, m, Ph), 5.36 (1H, m, H<sub>6</sub>), 3.99 (1H, t, H<sub>24</sub>), 3.60 (1H, m, H<sub>3</sub>), 0.99-0.92 (12H, m, H<sub>19</sub>, TBS-tBu), 0.77 (3H, d, H<sub>21</sub>), 0.54 (3H, s, H<sub>18</sub>), 0.07 (6H, d TBS-Me).

## References

- [S1] D. C. Kapeller, L. Brecker F. Hammerschmidt, *Chem. E. J.* **2007**, *13*, 9582-9588.
- [S2] a) S. Li, J. Pang, W. K. Wilson G. J. Schroepfer, Jr., *Chem. Phys. Lipids* **1999**, *99*, 33-71; b) W. K. Wilson, S. Swaminathan, F. D. Pinkerton, N. Gerst G. J. Schroepfer, *Steroids* **1994**, *59*, 310-317.
- [S3] Y. Nishida, H. Uzawa, S. Hanada, H. Ohru H. Meguro, *Agric. Biol. Chem.* **1989**, *53*, 2319-2326.
- [S4] K. Ohyama, A. Okawa Y. Fujimoto, *Bioorg. Med. Chem. Lett.* **2014**, *24*, 3556-3558.
- [S5] R. Martin, E. V. Entchev, F. Dabritz, T. V. Kurzchalia H. J. Knolker, *Eur. J. Org. Chem.* **2009**, 3703-3714.
- [S6] J. B. Johnston, A. A. Singh, A. A. Clary, C. K. Chen, P. Y. Hayes, S. Chow, J. J. De Voss P. R. Ortiz de Montellano, *Bioorg. Med. Chem.* **2012**, *20*, 4064-4081.





Filename = YI-167-F15-30\_proton-1-2.j

Author = Murata  
 Experiment = Proton\_jmp  
 Sample\_Id = YI-167-F15-30  
 Solvent = CHLOROFORM-D  
 Creation\_Time = 12-APR-2017 17:09:33  
 Revision\_Time = 30-JAN-2019 15:04:19  
 Current\_Time = 30-JAN-2019 15:08:17

Comment = Sample Pulse  
 Data Format = 1D COMPLEX  
 Data Size = 52429  
 Dim Title = Proton  
 Dim Units = [ppm]  
 Dimensions = X  
 Site = MCA 500  
 Spectrometer = JNM-ECAS500

Field Strength = 11.747379[T] (500 [MHz])  
 X Acq Duration = 6.98351616[s]  
 X Domain = IN  
 X Freq = 500.15991521 [MHz]  
 X Offset = 5.0 [ppm]  
 X Points = 65536  
 X Prescans = 1  
 X Resolution = 0.14319434 [Hz]  
 X Sweep = 9.38436438 [kHz]  
 X Sweep\_Clippped = 7.50750751 [kHz]  
 Irx Domain = Proton  
 Irx Freq = 500.15991521 [MHz]  
 Irx Offset = 5.0 [ppm]  
 Tr1 Domain = Proton  
 Tr1 Freq = 500.15991521 [MHz]  
 Tr1 Offset = 5.0 [ppm]  
 Clipped = FALSE  
 Scans = 6  
 Total\_Scans = 6

Relaxation\_Delay = 5[s]  
 Recv Gain = 21.7 [dC]  
 Temp Setpt = 2.4 [us]  
 X90 Width = 6.98351616 [s]  
 X Acq Time = 45 [deg]  
 X Angle = 4.5 [dB]  
 X Atn = 3.2 [us]  
 X Pulse = Off  
 Irx Mode = Off  
 Tr1 Mode = FALSE  
 Date Preset = 1[s]  
 Initial Wait = 11.98351616 [s]  
 Repetition\_Time = 11.98351616 [s]

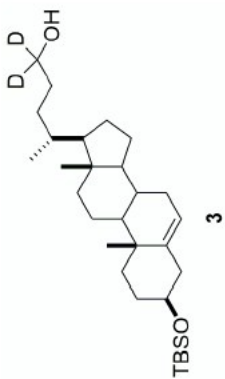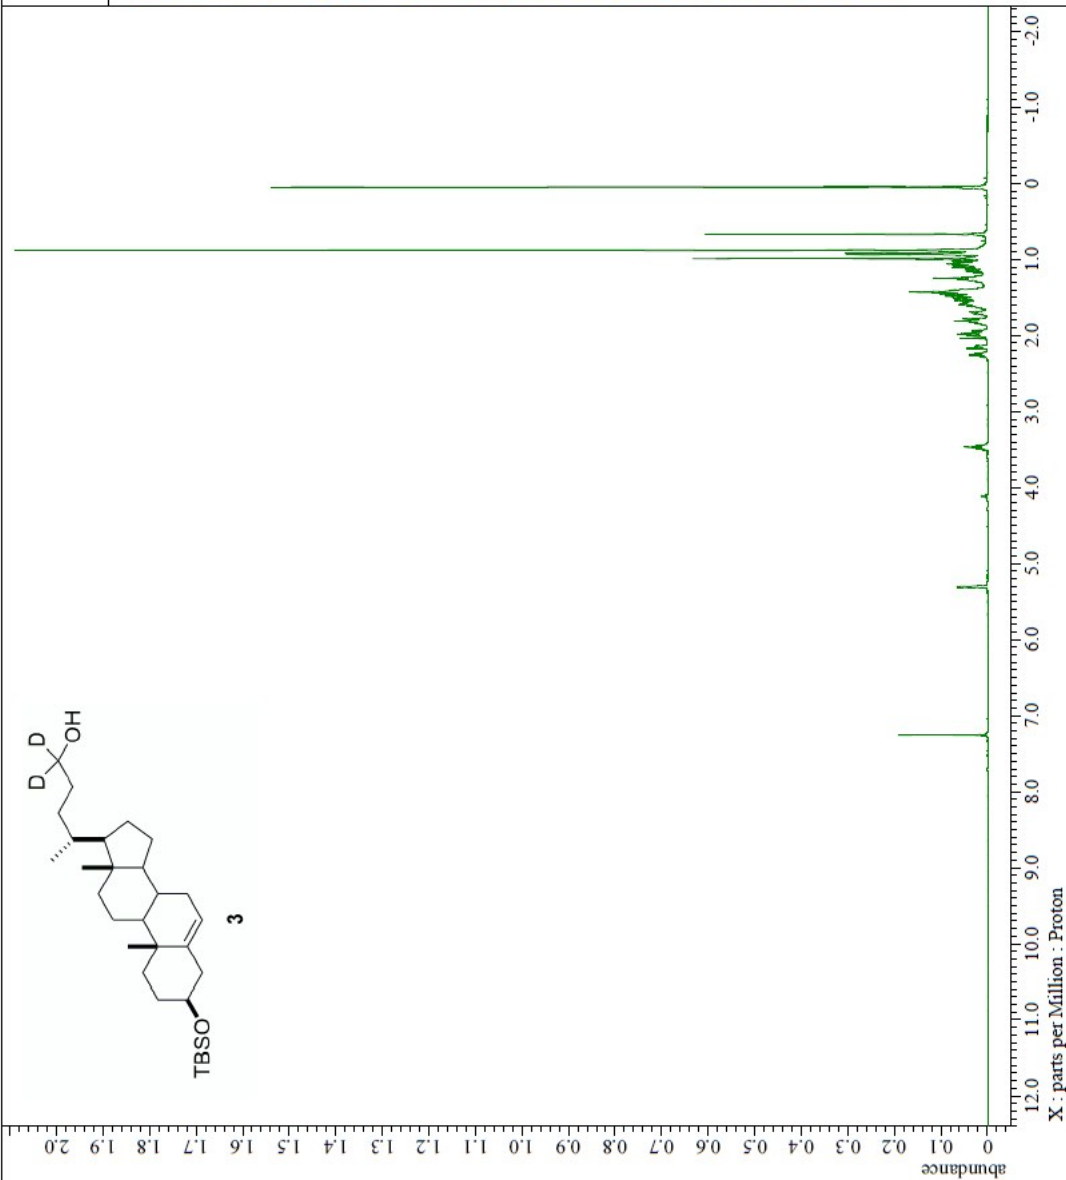

Filename = Y12-115-F9-29\_proton-1-2.j  
 Author = Murata  
 Experiment = Proton\_jmp  
 Sample\_Id = Y12-115-F9-29  
 Solvent = CHLOROFORM-D  
 Creation\_Time = 9-FEB-2018 17:34:12  
 Revision\_Time = 30-JAN-2019 15:27:42  
 Current\_Time = 30-JAN-2019 15:28:12

Comment = single\_pulse  
 Data\_Format = AD COMPLEX  
 Dam\_Size = 52429  
 Dam\_Title = Proton  
 Dam\_Units = [ppm]  
 Dimensions = X  
 Site = MCA 500  
 Spectrometer = DELTA2\_NMR

Field\_Strength = 11.7473579[T] (500[MHz])  
 X\_Acq\_Duration = 6.99351616[s]  
 X\_Domain = Hz  
 X\_Freq = 500.15991521[MHz]  
 X\_Offset = 5.0[ppm]  
 X\_Points = 65536  
 X\_Prescans = 1  
 X\_Resolution = 0.14319434[Hz]  
 X\_Sweep = 9.38436438[MHz]  
 X\_Sweep\_Clippped = 7.50750751[MHz]  
 Irr\_Domain = Proton  
 Irr\_Freq = 500.15991521[MHz]  
 Irr\_Offset = 5.0[ppm]  
 Tri\_Domain = Proton  
 Tri\_Freq = 500.15991521[MHz]  
 Tri\_Offset = 5.0[ppm]  
 Clipped = FALSE  
 Scans = 8  
 Total\_Scans = 8

Relaxation\_Delay = 5[s]  
 Recvr\_Gain = 30  
 Temp\_Get = 20[dC]  
 X\_90\_Width = 12.7[us]  
 X\_Acq\_Time = 6.99351616[s]  
 X\_Angle = 45[deg]  
 X\_Atn = 3.3[dB]  
 X\_Pulse = 6.35[us]  
 Irr\_Mode = OFF  
 Tri\_Mode = OFF  
 Dante\_Preset = FALSE  
 Initial\_Wait = 1[s]  
 Repetition\_Time = 11.90381616[s]

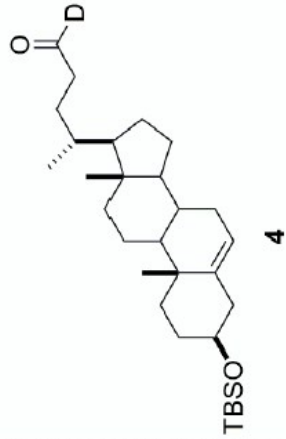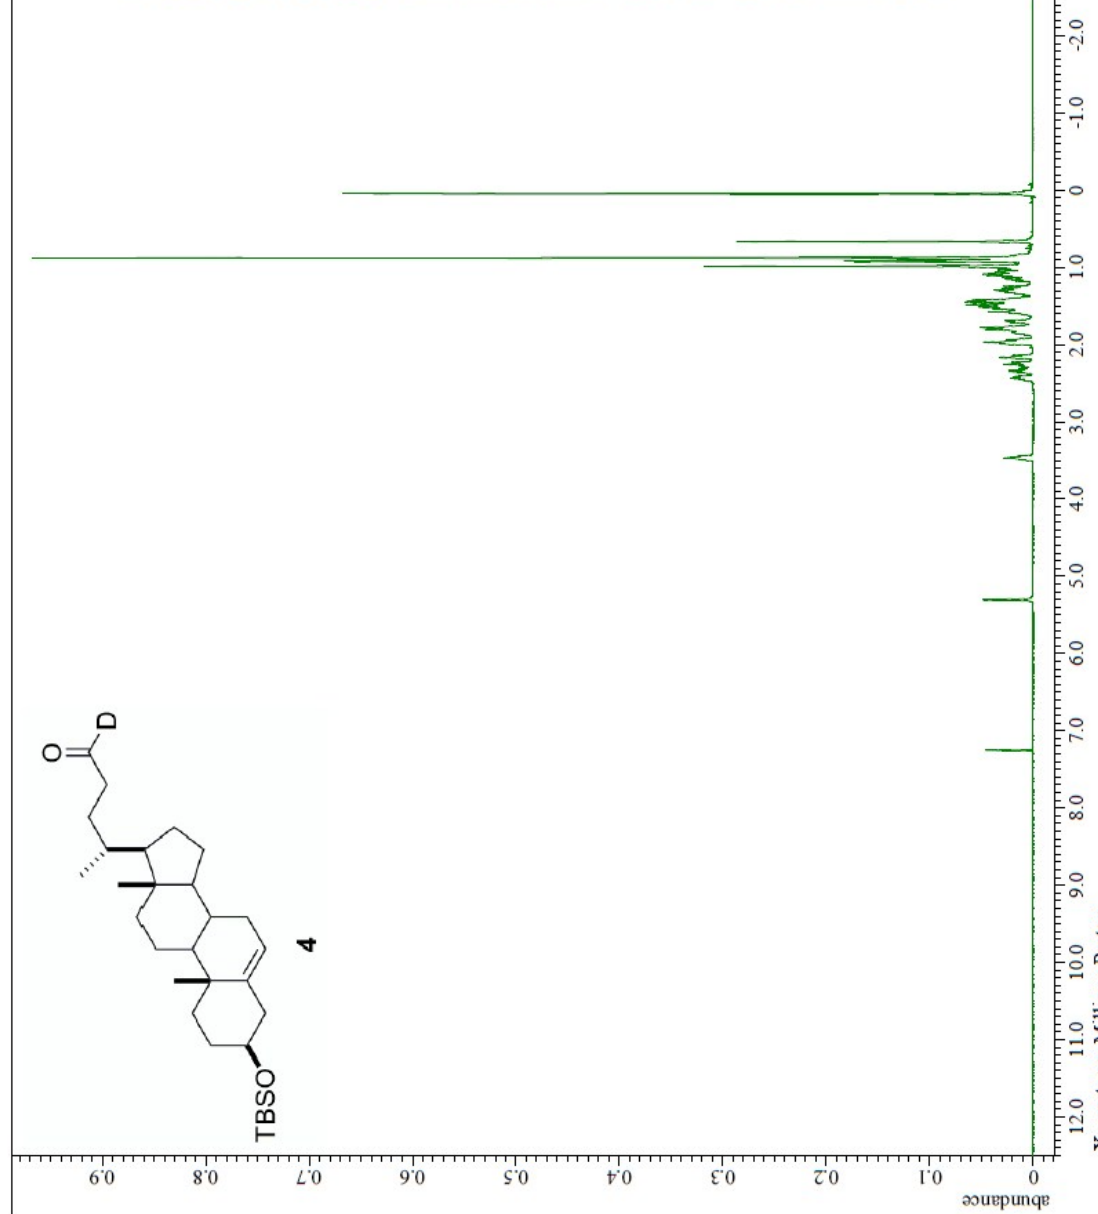

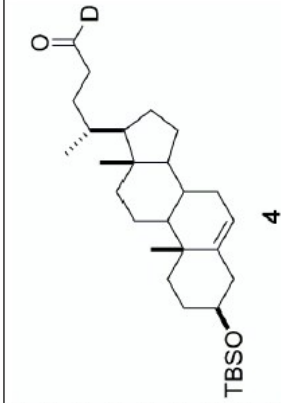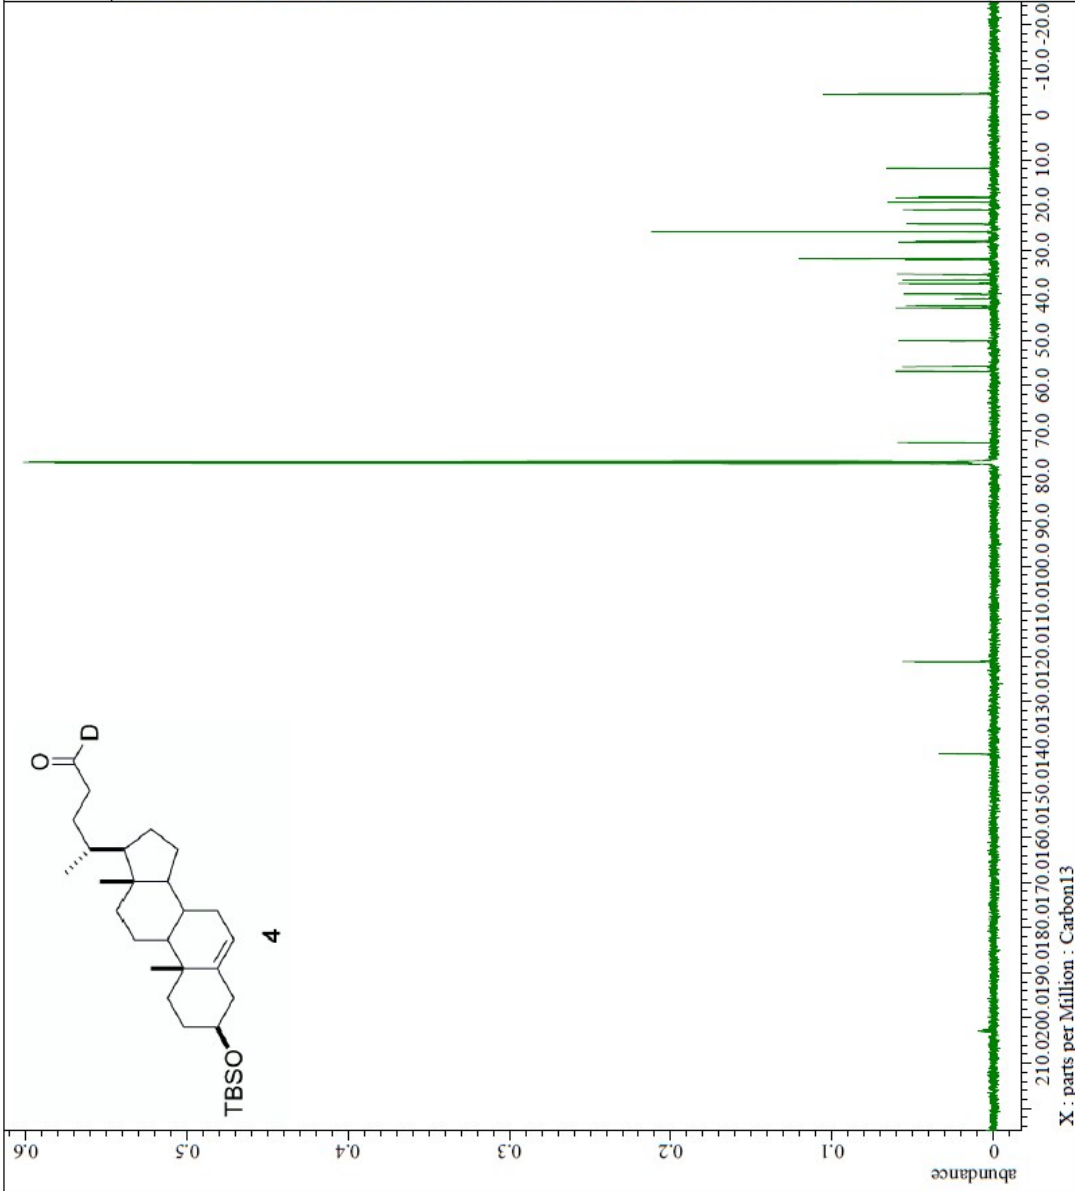

JEOL  
Solutions for Innovation

Filename = Y13-03-F19-26FCC\_carbon-1-  
 Author = Murata  
 Experiment = carbon\_jmp  
 Sample\_Id = Y13-03-F19-26FCC  
 Solvent = CHLOROFORM-D  
 Creation\_Time = 14:47:49  
 Revision\_Time = 12-MAR-2019 13:26:13  
 Current\_Time = 12-MAR-2019 13:26:22  
 Comment = single pulse decoupled gat  
 Data\_Format = 1D COMPMX  
 Dia\_Size = 52429  
 Dia\_Title = Carbon13  
 Dia\_Units = [ppm]  
 Dimensions = X  
 Site = MCA 500  
 Spectrometer = DELTA2\_NMR  
 Field Strength = 11.7473579[T] (500 [MHz])  
 X\_Acq Duration = 1.66723584[s]  
 X\_Domain = 13C  
 X\_Freq = 125.76529768 [MHz]  
 X\_Offset = 100 [ppm]  
 X\_Points = 65536  
 X\_Prescans = 4  
 X\_Resolution = 0.59979517 [Hz]  
 X\_Sweep = 39.3081761 [kHz]  
 X\_Sweep\_Clippped = 31.44654088 [kHz]  
 Irr\_Domain = Proton  
 Irr\_Freq = 500.15991521 [MHz]  
 Irr\_Offset = 5.0 [ppm]  
 Clipped = FALSE  
 Scans = 921  
 Total\_Scans = 921  
 Relaxation\_Delay = 2 [s]  
 Recvr\_Gain = 58  
 Temp\_Get = 25 [dC]  
 X\_90\_Width = 11.6 [us]  
 X\_Acq\_Time = 1.66723584 [s]  
 X\_Angle = 30 [deg]  
 X\_Atn = 10 [db]  
 X\_Pulse = 3.86666667 [us]  
 Irr\_Atn\_Dec = 20.5 [db]  
 Irr\_Atn\_Noise = 20.5 [db]  
 Irr\_Noise = WALTZ  
 Irr\_Width = 92 [us]  
 Decoupling = PRNP  
 Initiat\_Wait = 1 [s]  
 Noe\_Time = 2 [s]  
 Repetition\_Time = 3.66723584 [s]

Y12-119-F28-62\_proton-1-2.

Filename = Y12-119-F28-62\_proton-1-2.  
 Author = Murata  
 Experiment = Proton\_1xp  
 Sample\_Id = Y12-119-F28-62  
 Solvent = CHLOROFORM-D  
 Creation\_Time = 14-FEB-2018 11:31:59  
 Revision\_Time = 30-JAN-2019 15:29:12  
 Current\_Time = 30-JAN-2019 15:29:30  
 Comment = single\_pulse  
 Data\_Format = 1D\_COMPLEX  
 Dim\_Size = 52429  
 Dim\_Title = Proton  
 Dim\_Units = [ppm]  
 Dimensions = X  
 Site = BCA 500  
 Spectrometer = JNM-ECX500  
 Field\_Strength = 11.747379[T] (500[MHz])  
 X\_Acq\_Duration = 6.98351616[s]  
 X\_Domain = IR  
 X\_Freq = 500.15991621[MHz]  
 X\_Offset = 5.0[ppm]  
 X\_Points = 65536  
 X\_Prescans = 1  
 X\_Resolution = 0.14319434[Hz]  
 X\_Sweep = 9.38438438[Hz]  
 X\_Sweep\_Clipped = 7.50750751[Hz]  
 Ix1\_Domain = Proton  
 Ix1\_Freq = 500.15991621[MHz]  
 Ix1\_Offset = 5.0[ppm]  
 Tx1\_Domain = Proton  
 Tx1\_Freq = 500.15991621[MHz]  
 Tx1\_Offset = 5.0[ppm]  
 Clipped = FALSE  
 Scans = 8  
 Total\_Scans = 8  
 Relaxation\_Delay = 5[s]  
 Recvr\_Gain = 22  
 Temp\_Get = 21.5[degC]  
 X\_90\_Width = 6.4[us]  
 X\_Acq\_Time = 6.98351616[s]  
 X\_Angle = 45[deg]  
 X\_Atn = 4.5[dB]  
 X\_Pulse = 3.2[us]  
 Ix1\_Mode = Off  
 Tx1\_Mode = Off  
 Data\_Preset = FALSE  
 Initial\_Weit = 1[s]  
 Repetition\_Time = 11.98351616[s]

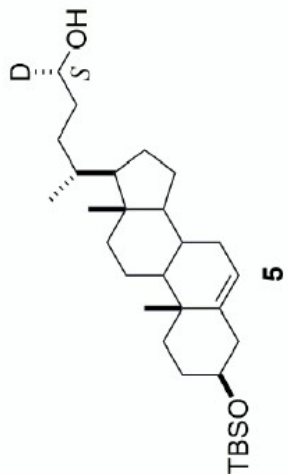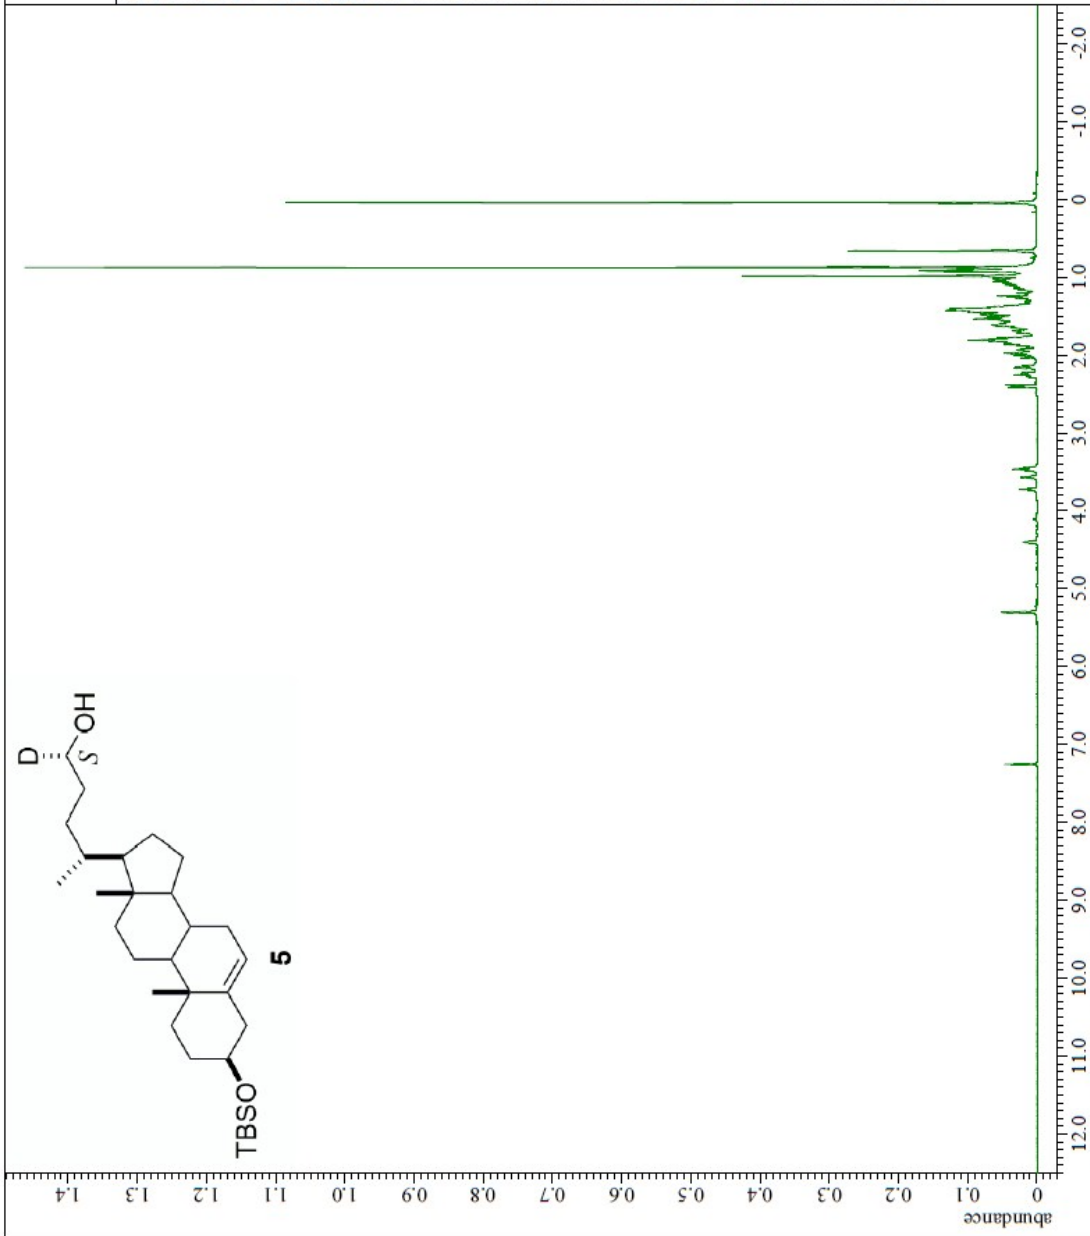

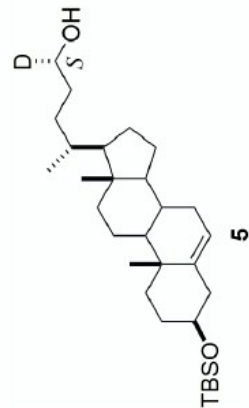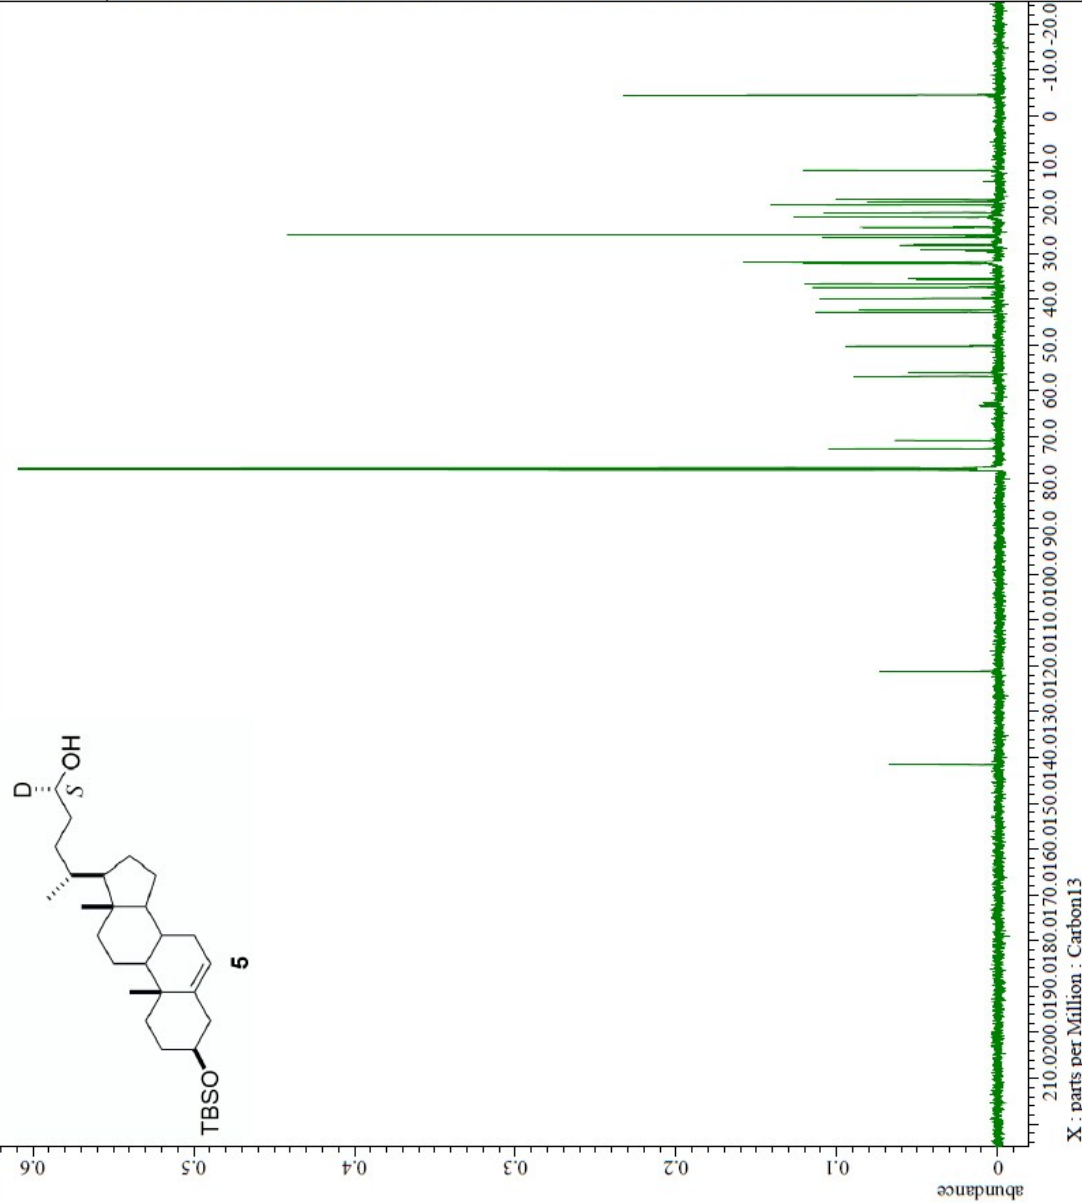

JEOL  
Solutions for Innovation

File Name = Y13-05-FZ6-S1\_carbon-1-2.j  
 Author = Hurata  
 Experiment = carbon.jcf  
 Sample\_Id = Y13-05-FZ6-S1  
 Solvent = CHLOROFORM-D  
 Creation\_Time = 28-FEB-2019 14:11:34  
 Revision\_Time = 12-MAR-2019 13:25:20  
 Current\_Time = 12-MAR-2019 13:25:24

Comment = single pulse decoupled gat  
 Data\_Format = 1D COMPLEX  
 Dim\_Size = 32429  
 Dim\_Title = Carbon13  
 Dim\_Units = [ppm]  
 Dimensions = 1  
 Site = NCA\_500  
 Spectrometer = DELTA2\_NMR

Field\_Strength = 11.7473579 [T] (500 [MHz])  
 X\_Acq\_Duration = 1.66723584 [s]  
 X\_Det\_Acquisition = 13C\_76529768 [MHz]  
 X\_Freq = 125.76529768 [MHz]  
 X\_Offset = 100 [ppm]  
 X\_Points = 65536  
 X\_Precans = 4  
 X\_Resolution = 0.59979517 [Hz]  
 X\_Sweep\_Duration = 39.3081761 [kHz]  
 X\_Sweep\_Clippped = 31.44654088 [kHz]  
 X\_Domain = Proton  
 Xr\_Freq = 500.15991521 [MHz]  
 Xr\_Offset = 5.0 [ppm]  
 Clipped = FALSE  
 Scans = 691  
 Total\_Scans = 691

Relaxation\_Delay = 2 [s]  
 Recv\_Gain = 58  
 Temp [C] = 25 [dC]  
 X\_90\_Width = 11.6 [us]  
 X\_Acq\_Time = 1.66723584 [s]  
 X\_Angle = 30 [deg]  
 X\_Atn = 10 [dB]  
 X\_Pulse = 3.86666667 [us]  
 Xr\_Atn\_Dec = 20.5 [dB]  
 Xr\_Atn\_Noise = 20.5 [dB]  
 Xr\_Noise = WALTZ  
 Xr\_Width = 92 [us]  
 Decoupling = TRUE  
 Initial\_Wait = 1 [s]  
 Noe\_Time = TRUE  
 Noe\_Time = 2 [s]  
 Repetition\_Time = 3.66723584 [s]

Filename = Y12-163-Fl-7\_Proton-1-2.jd  
 Author = Murata  
 Experiment = Proton.jfif  
 Sample\_Id = Y12-163-Fl-7  
 Solvent = CHLOROFORM-D  
 Creation\_Time = 21-JUN-2018 17:15:39  
 Revision\_Time = 30-JAN-2019 15:31:04  
 Current\_Time = 30-JAN-2019 15:31:16

Comment = single\_pulse  
 Data\_Format = ID COMPLEX  
 Diam\_Size = 52429  
 Diam\_Title = Proton  
 Diam\_Units = [ppm]  
 Dimensions = X  
 Site = MCA 500  
 Spectrometer = DELTA2\_NMR

Field\_Strength = 11.7473579 [T] (500 [MHz])  
 X\_Acq\_Duration = 6.98351616 [s]  
 X\_Domain = IR  
 X\_Freq = 500.15991521 [MHz]  
 X\_Offset = 5.0 [ppm]  
 X\_Points = 65536

X\_Prescans = 1  
 X\_Resolution = 0.14319434 [Hz]  
 X\_Sweep = 9.38438438 [kHz]  
 X\_Sweep\_Clippped = 7.50750751 [kHz]  
 Irx\_Domain = Proton  
 Irx\_Freq = 500.15991521 [MHz]  
 Irx\_Offset = 5.0 [ppm]

Tri\_Domain = Proton  
 Tri\_Freq = 500.15991521 [MHz]  
 Tri\_Offset = 5.0 [ppm]  
 Clipped = FALSE  
 Scans = 8  
 Total\_Scans = 8

Relaxation\_Delay = 5 [s]  
 Recvr\_Gain = 30  
 Temp\_Get = 20.8 [dC]  
 X\_90\_Width = 12.7 [us]  
 X\_Acq\_Time = 6.98351616 [s]  
 X\_Angle = 45 [deg]  
 X\_Atn = 3.3 [dB]  
 X\_Pulse = 6.35 [us]  
 Irx\_Mode = Off  
 Tri\_Mode = Off  
 Dante\_Preset = FALSE  
 Initial\_Wait = 1 [s]  
 Repetition\_Time = 11.98351616 [s]

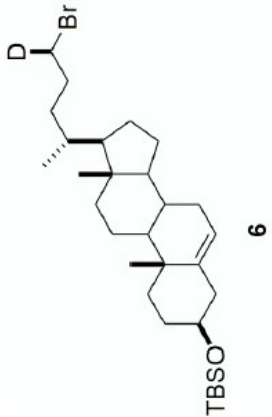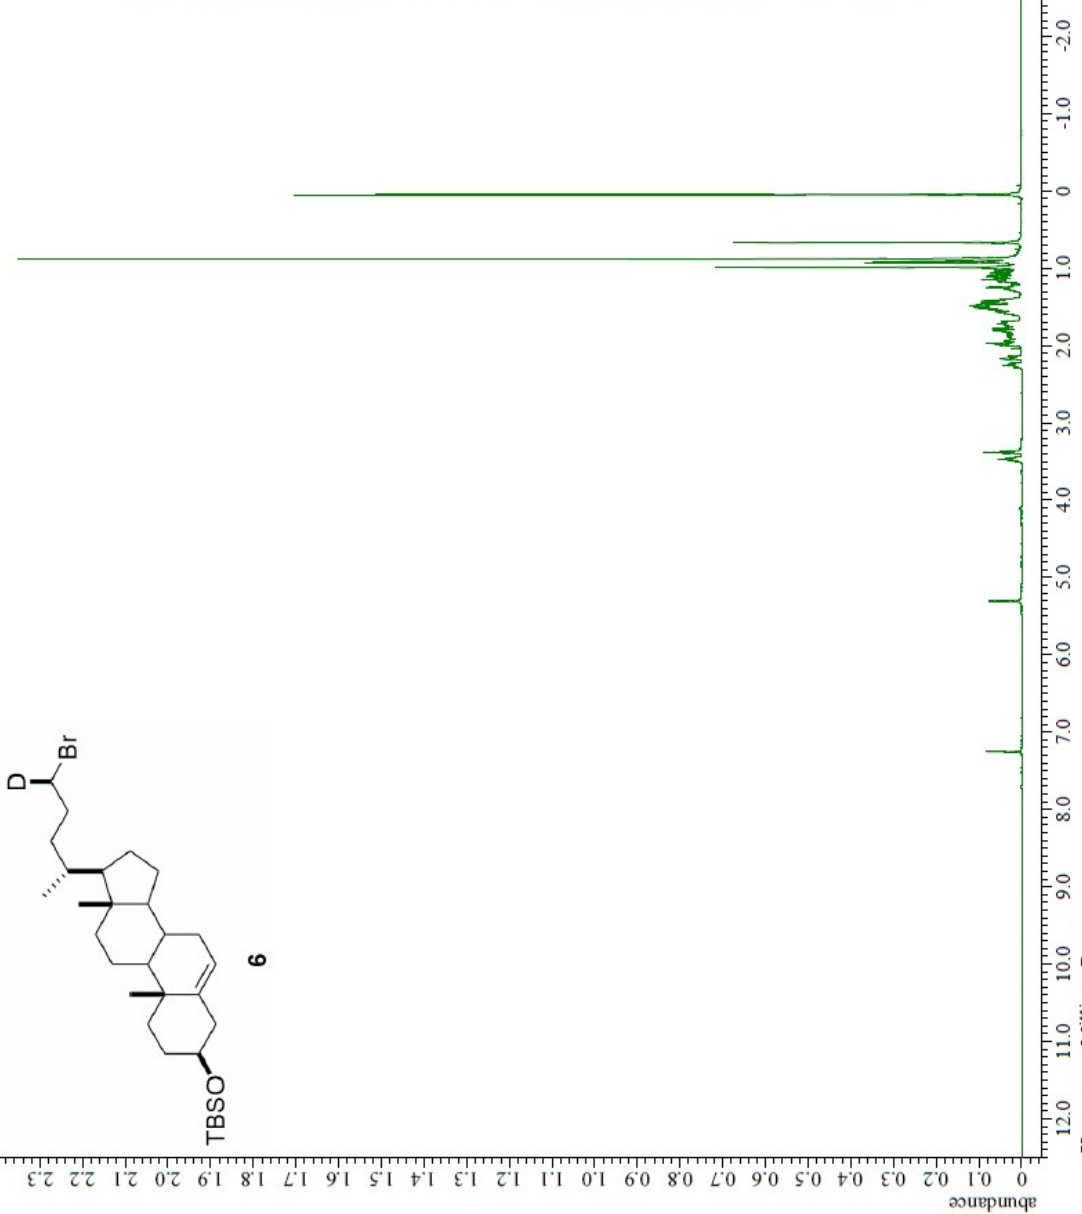



Filename = Y13-87-F3-6\_carbon-1-2.jdf  
 Author = Murata  
 Experiment = carbon.jxp  
 Sample\_Id = Y13-87-F3-6  
 Solvent = CHLOROFORM-D  
 Creation\_Time = 27-FEB-2019 09:55:39  
 Revision\_Time = 12-MAR-2019 13:23:44  
 Current\_Time = 12-MAR-2019 13:23:50

Comment = single pulse decoupled gat  
 Data\_Format = ID COMPLEX  
 Data\_Size = 52429  
 Data\_Title = Carbon13  
 Data\_Units = [ppm]  
 Dimensions = X  
 Site = BCCA 500  
 Spectrometer = JNM-BCA500

Field\_Strength = 11.7473579 [T] (500 [MHz])  
 X\_Acq\_Duration = 1.66723884 [s]  
 X\_Domain = 13C  
 X\_Freq = 125.76529768 [MHz]  
 X\_Offset = 100 [ppm]  
 X\_Points = 65536  
 X\_Prescans = 4  
 X\_Resolution = 0.59979517 [Hz]  
 X\_Sweep = 39.3061761 [kHz]  
 X\_Sweep\_Clippped = 31.44654088 [kHz]  
 Irr\_Domain = Proton  
 Irr\_Freq = 500.15991521 [MHz]  
 Irr\_Offset = 5.0 [ppm]  
 Clipped = TRUE  
 Scans = 551  
 Total\_Scans = 551

Relaxation\_Delay = 2 [s]  
 Recvrz\_Gain = 54  
 Temp\_Get = 25 [dC]  
 X\_90\_Width = 22 [us]  
 X\_Acq\_Time = 1.66723884 [s]  
 X\_Angle = 30 [deg]  
 X\_Atn = 7 [dB]  
 X\_Pulse = 7.33333333 [us]  
 Irr\_Atn\_Dec = 27.65 [dB]  
 Irr\_Atn\_Noise = 27.65 [dB]  
 Irr\_Noise = WALTZ  
 Irr\_Width = 92 [us]  
 Decoupling = TRUP  
 Initial\_Wait = 1 [s]  
 Noe\_Time = TRUP  
 Repetition\_Time = 3.66723884 [s]

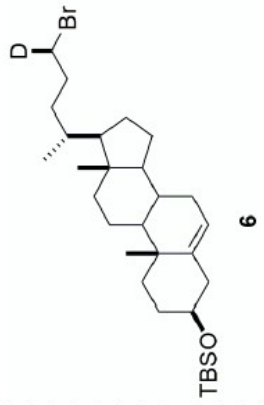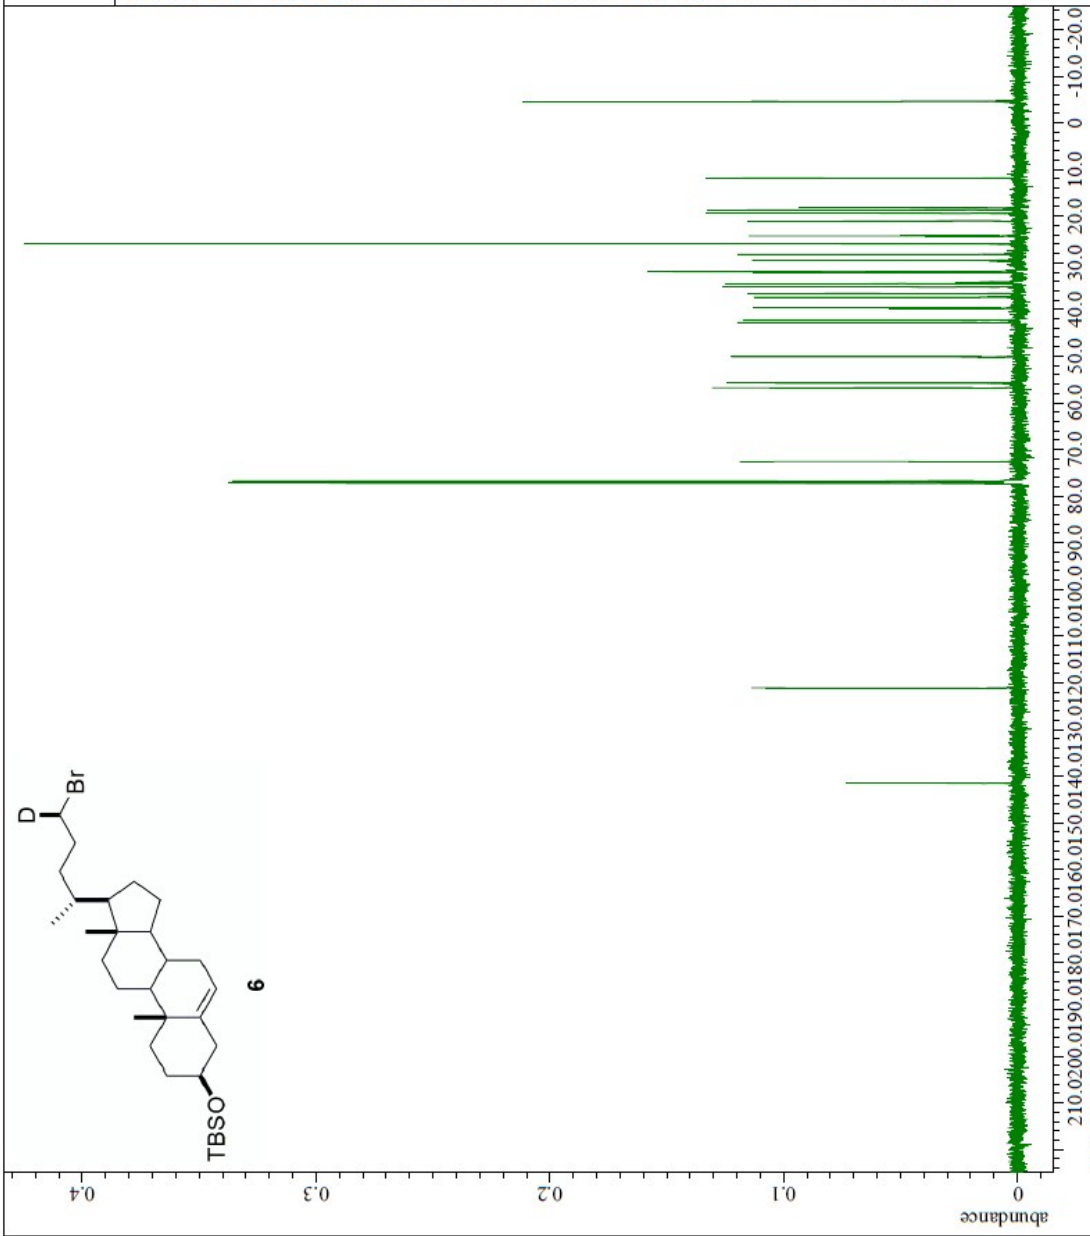

```

Filename = YI-137-F7-13-benzen_proton
Author = Murata
Experiment = proton_jkp
Sample Id = YI-137-F7-13-benzen
Solvent = BENZENE-D6
Creation Time = 18-JAN-2017 11:03:39
Revision Time = 26-FEB-2019 15:16:01
Current Time = 26-FEB-2019 15:16:57

Comment = single pulse
Data Format = 1D COMPLEX
Dim Size = 52429
Dim Title = Proton
Dim Units = [ppm]
Dimensions = X
Site = ECA 500
Spectrometer = DELTA2_NMR

Field Strength = 11.7473579[T] (500 [MHz])
X_Acq_Duration = 6.98351616[s]
X_Domain = 1H
X_Freq = 500.15991521 [MHz]
X_Offset = 5.0 [ppm]
X_Points = 65536
X_Prescans = 1
X_Resolution = 0.14319434 [Hz]
X_Sweep = 9.38438438 [kHz]
X_Sweep_Clippped = 7.50750751 [kHz]
Irr_Domain = Proton
Irr_Freq = 500.15991521 [MHz]
Irr_Offset = 5.0 [ppm]
Tri_Domain = Proton
Tri_Freq = 500.15991521 [MHz]
Tri_Offset = 5.0 [ppm]
Clipped = FALSE
Scans = 8
Total_Scans = 8

Relaxation_Delay = 5 [s]
Recvr_Gain = 44
Temp_Get = 18.2 [dc]
X_90_Width = 11.4 [us]
X_Acq_Time = 6.98351616 [s]
X_Angle = 45 [deg]
X_Atn = 2.7 [dB]
X_Pulse = 5.7 [us]
Irr_Mode = Off
Tri_Mode = Off
Dante_Presat = FALSE
Initial_Wait = 1 [s]
Repetition_Time = 11.98351616 [s]
  
```

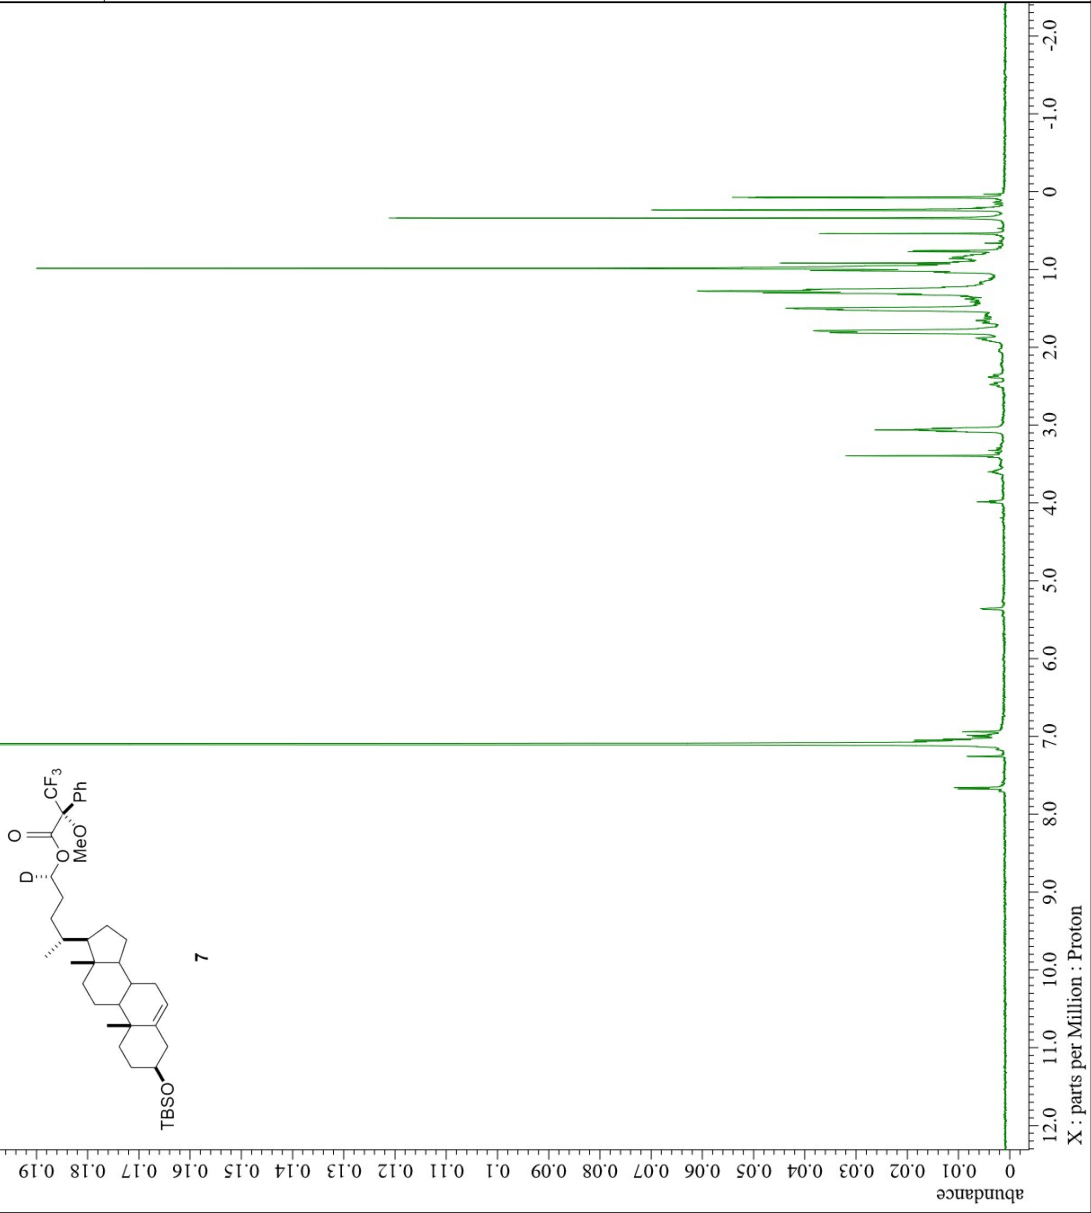

Supplement: c9ob01342c1.pdf [file c9ob01342c1.pdf]
